# Supplementary material for: Pulsed laser deposition of a Bi2S3/CuInS2/TiO2 cascade structure for high photoelectrochemical performance
Source: Royal Society of Chemistry journal article supplement (doi:10.1039/c6ra14901d), 2016-01-01
Supplement: c6ra14901d1.pdf [file c6ra14901d1.pdf]

## Supporting Information

### **<sup>1</sup> Pulsed laser deposition of Bi<sub>2</sub>S<sub>3</sub>/CuInS<sub>2</sub>/TiO<sub>2</sub> cascade structure for high photoelectrochemical performance**

Minmin Han<sup>a,b</sup>, Junhong Jia<sup>a,\*</sup>, Wenzhen Wang<sup>a,\*</sup>

<sup>a</sup> State Key Laboratory of Solid Lubrication, Lanzhou Institute of Chemical Physics, Chinese Academy of Sciences, Lanzhou, 730000, P. R. China.

<sup>b</sup> University of Chinese Academy of Sciences, Beijing, 100080, P. R. China.

---

\* Corresponding author. Tel./Fax: +86-931-4968611.  
E-mail address: jhjia@licp.cas.cn (J. Jia)

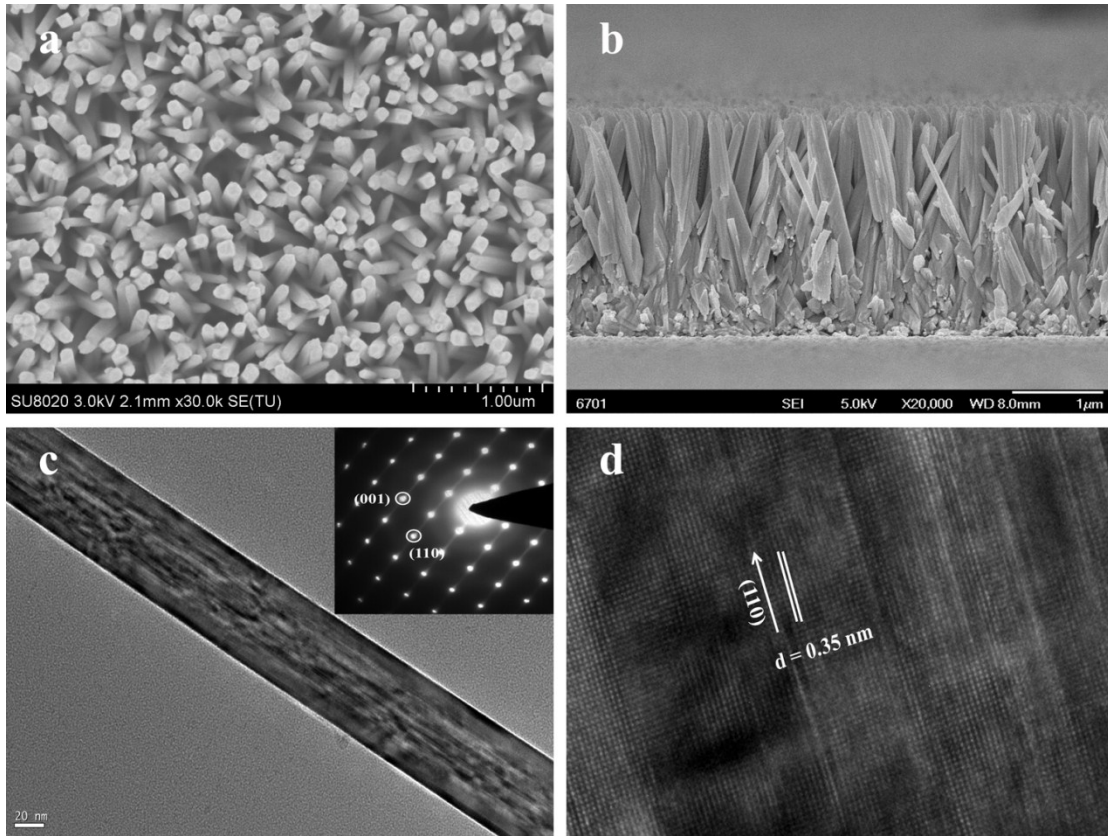

Fig. S1 Typical top-view (a) and cross-section view (b) FESEM images of plain TiO<sub>2</sub> nanorods. TEM (c) and HRTEM (d) images of TiO<sub>2</sub> nanorods, the inset in (c) is the selected-area electron diffraction pattern of TiO<sub>2</sub> nanorods.

Fig. S1a shows a typical top-view FESEM image of the plain TiO<sub>2</sub> nanorods. The TiO<sub>2</sub> nanorods with tetragonal crystal planes grow uniformly all over the FTO substrate with an obvious porosity between them. The cross-sectional view (Fig. S1b) demonstrates that the TiO<sub>2</sub> nanorods are vertically aligned and the length of TiO<sub>2</sub> nanorods is about 2  $\mu\text{m}$ . Fig. S1c and d show the TEM and HRTEM images of the plain TiO<sub>2</sub> nanorods. It can be found that the diameter of plain TiO<sub>2</sub> nanorod is around 110 nm (Fig. S1c). The SAED pattern (the inset in Fig. S1c) and the HRTEM image (Fig. S1d) confirm that the nanorods are single crystalline. The HRTEM image shows a (110) lattice spacing of 0.35 nm, and the nanorods grow along the (110) crystal

plane with a preferred (001) orientation. The X-ray diffraction (XRD) spectrum displayed in Fig. 1f also confirms the single crystalline nature of TiO<sub>2</sub> nanorods, and the nanorods can be classified as tetragonal rutile phase (JCPDS file no. 21-1276) as all the characteristic peaks of TiO<sub>2</sub> nanorods agree well with rutile phase.

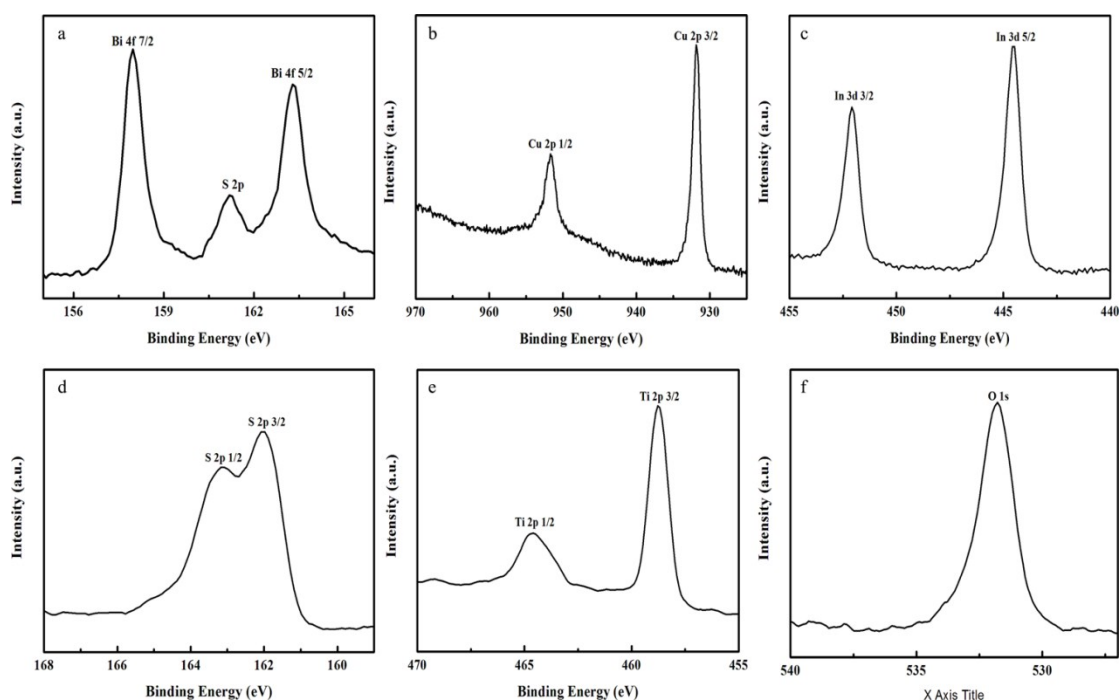

Fig. S2 High-resolution XPS spectra of BS(300)/CIS(350)/TiO<sub>2</sub>: (a) Bi 4f, (b) Cu 2p, (c) In 3d, (d) S 2p, (e) Ti 2p and (f) O 1s.

In order to determine the composition and valence state of elements in BS(300)/CIS(350)/TiO<sub>2</sub>, the XPS analysis is conducted as shown in Fig. S2. The elements binding energy of high resolution spectrum was revised refer to the binding energy of C1s (284.8 eV). Fig. S2a shows the high-resolution spectrum of Bi4f, the peaks of which is located in 158.5 eV (Bi 4f<sub>7/2</sub>) and 163.8eV (Bi 4f<sub>5/2</sub>), which are in agree with that of Bi<sub>2</sub>S<sub>3</sub> in literature.<sup>1</sup> As shown in Fig. S2b, the binding energies of 931.9 eV (Cu 2p<sub>3/2</sub>) and 951.8 eV (Cu 2p<sub>1/2</sub>) are consistent with Cu (I). The binding energies of In 3d are 444.5 eV (In 3d<sub>5/2</sub>) and 452.08 eV (In 3d<sub>3/2</sub>), suggesting the

presence of In (III) (Fig. S2c). The close up survey in S 2p region (161.8 eV) doublet peaks locate at 161.38 eV (S 2p<sub>3/2</sub>) and 162.5 eV (S 2p<sub>1/2</sub>) with an energy difference of 1 eV (Fig. S2d), which are assigned to S coordinated to Cu and In.<sup>2</sup> Moreover, the peaks of the binding energies at 458.7 eV and 464.6 eV were assigned to Ti 2p<sub>3/2</sub> and Ti 2p<sub>1/2</sub> (Fig. S2e), which are attributed to that of crystalline rutile TiO<sub>2</sub>, and the binding energy of the O 1s peak displayed in Fig. 3f at about 532.1 eV corresponds to that of O in TiO<sub>2</sub>.<sup>3</sup>

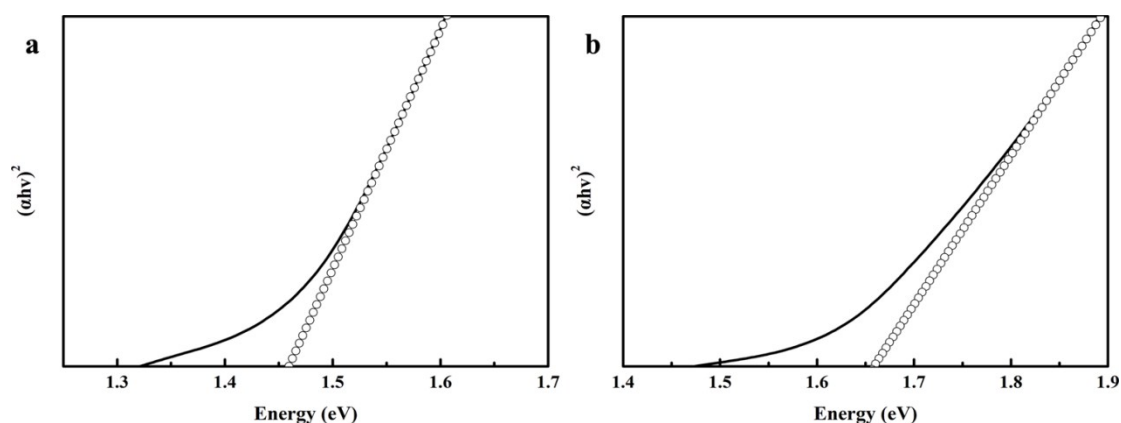

Fig. S3 The plots of  $(\alpha h\nu)^2$  against photon energy ( $h\nu$ ) for BS(300) films (a) and CIS(350) films (b).

Fig. S3 shows the plots of  $(\alpha h\nu)^2$  against photon energy ( $h\nu$ ) for BS(300) films and CIS(350) films, and the band gap of Bi<sub>2</sub>S<sub>3</sub> QDs and CuInS<sub>2</sub> QDs is determined to be 1.46 eV and 1.66 eV respectively according to the long wavelength extrapolation of the band gap. Compared with that of the bulk Bi<sub>2</sub>S<sub>3</sub> and CuInS<sub>2</sub>, the band gaps of the two QDs all have changed, suggesting the presence of quantum size effect.

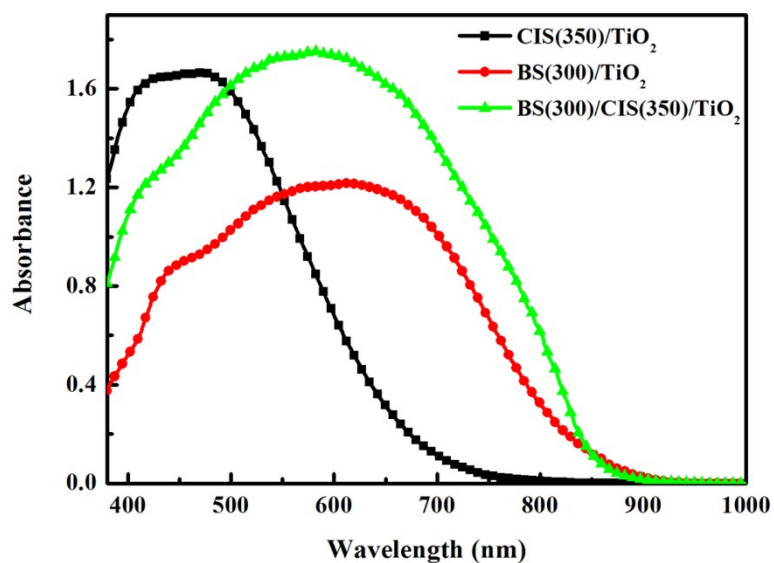

Fig. S4 UV-vis absorption spectra of various photoelectrodes.

Table S1 Photovoltaic parameters of QDSSCs assembled with BS(300)/CIS(350)/TiO<sub>2</sub> and BS(300)/TiO<sub>2</sub> photoelectrodes (each group has 5 devices in parallel).

| Samples                           | V <sub>OC</sub> (V) | J <sub>SC</sub> (mA/cm <sup>2</sup> ) | FF   | η (%) |
|-----------------------------------|---------------------|---------------------------------------|------|-------|
| BS(300)/CIS(350)/TiO <sub>2</sub> | 0.49                | 19.62                                 | 0.50 | 4.81  |
|                                   | 0.48                | 19.55                                 | 0.49 | 4.57  |
|                                   | 0.47                | 19.63                                 | 0.50 | 4.60  |
|                                   | 0.49                | 19.65                                 | 0.48 | 4.67  |
|                                   | 0.47                | 20.29                                 | 0.49 | 4.70  |
|                                   | 0.46                | 15.84                                 | 0.45 | 3.31  |
| BS(300)/TiO <sub>2</sub>          | 0.46                | 15.61                                 | 0.46 | 3.28  |
|                                   | 0.45                | 15.78                                 | 0.46 | 3.27  |
|                                   | 0.47                | 15.79                                 | 0.45 | 3.29  |
|                                   | 0.45                | 16.12                                 | 0.46 | 3.31  |

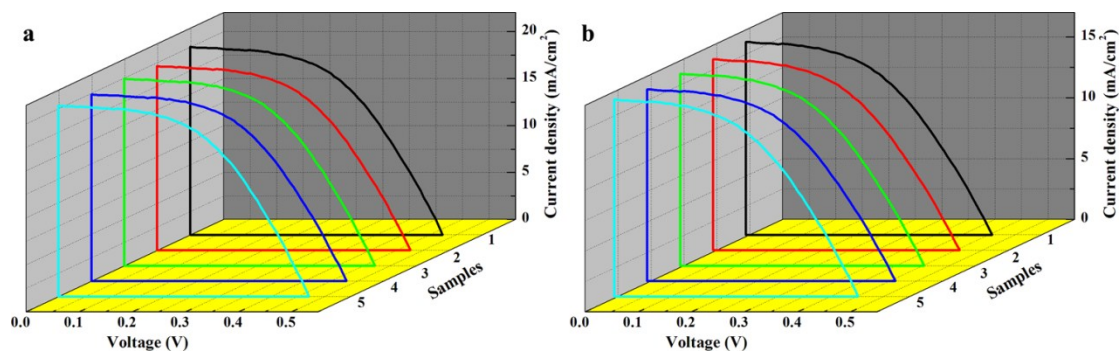

Fig. S5 J-V characteristics (b) of QDSSCs assembled with (a) BS(300)/CIS(350)/TiO<sub>2</sub> and (b) BS(300)/TiO<sub>2</sub> photoelectrodes (each group has 5 devices in parallel).

## REFERENCES

- (1) Y. Huang, G. Xie, S. Chen and S. Gao, *Journal of Solid State Chemistry*, 2011, 184, 502-508.
- (2) Y. Shi, Z. Jin, C. Li, H. An, J. Qiu, *Appl. Surf. Sci.* 252 (2006) 3737.
- (3) D. Huang, Z. D. Xiao, J. H. Gu, N. P. Huang, C. W. Yuan, *Thin Solid Films* 305 (1997) 110.
